# Supplementary material for: Synthesis of supramolecular polymers with calix[4]arene and β-cyclodextrin and their application in heavy metal ion absorption
Source: Royal Society of Chemistry journal article supplement (doi:10.1039/d4ra05559d), 2024-01-01

# Synthesis of Supramolecular Polymers with Calix[4]arene and $\beta$ -Cyclodextrin and Their Application in Heavy Metal Ions Absorption

Jian-Jian Bian<sup>a</sup>, Shi-jin Tang<sup>a</sup>, Jiao Miao<sup>a</sup>, Rui Lin<sup>\*b</sup>, Guo-li Huang, Ming-yu Teng<sup>\*a</sup> and Xiao-mei Li<sup>\*a</sup>

<sup>a</sup>Faculty of Chemistry and Chemical Engineering, Yunnan Normal University, Kunming 650500, China. (phone: +86 871 65941087; fax: +86 871 65941088)

<sup>b</sup>Image and Text Information Center, Yunnan Normal University, Kunming 650500, China (phone/fax: +86 871 65912939)

Corresponding Authors

Rui Lin, Email: [532712149@qq.com](mailto:532712149@qq.com)

Ming-yu Teng, Email: [myteng@ynnu.edu.cn](mailto:myteng@ynnu.edu.cn)

Xiao-mei Li, Email: [425931826@qq.com](mailto:425931826@qq.com)

## Contents

|                                                                                                                      |     |
|----------------------------------------------------------------------------------------------------------------------|-----|
| I. NMR spectra .....                                                                                                 | S2  |
| II. Adsorption rate of 5 chosen heavy metal ions in different pH solutions by title<br>supramolecular polymers ..... | S13 |

## I. NMR spectra

Figure S1.1 The  $^1\text{H}$  NMR spectrum of UPy

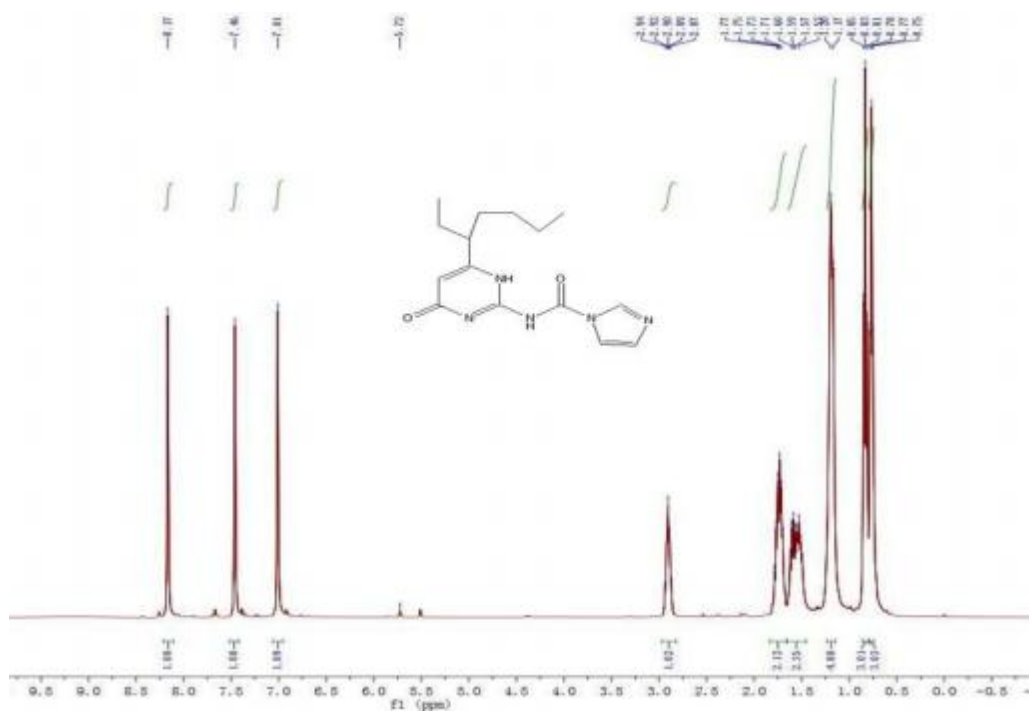

Figure S1.2 The  $^1\text{H}$  NMR spectrum of b1

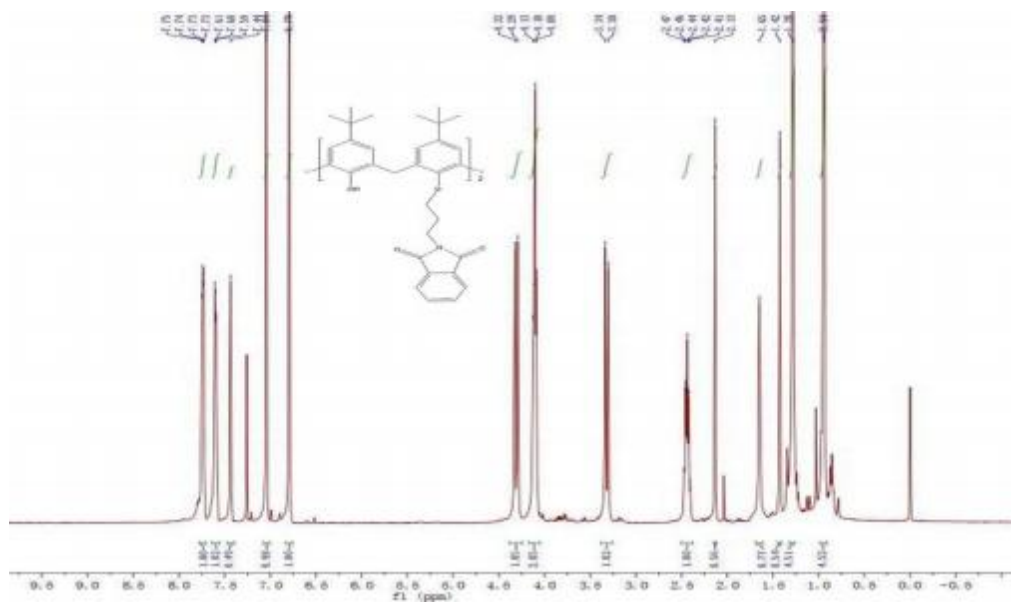

Figure S1.3 The  $^1\text{H}$  NMR spectrum of b2

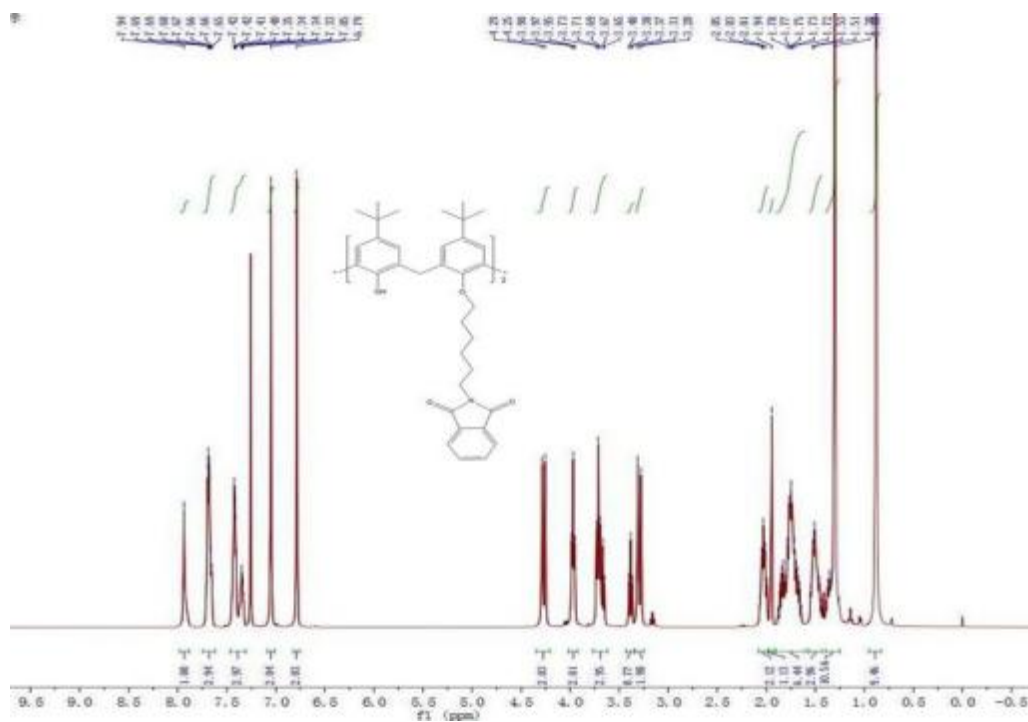

Figure S1.4 The  $^1\text{H}$  NMR spectrum of b3

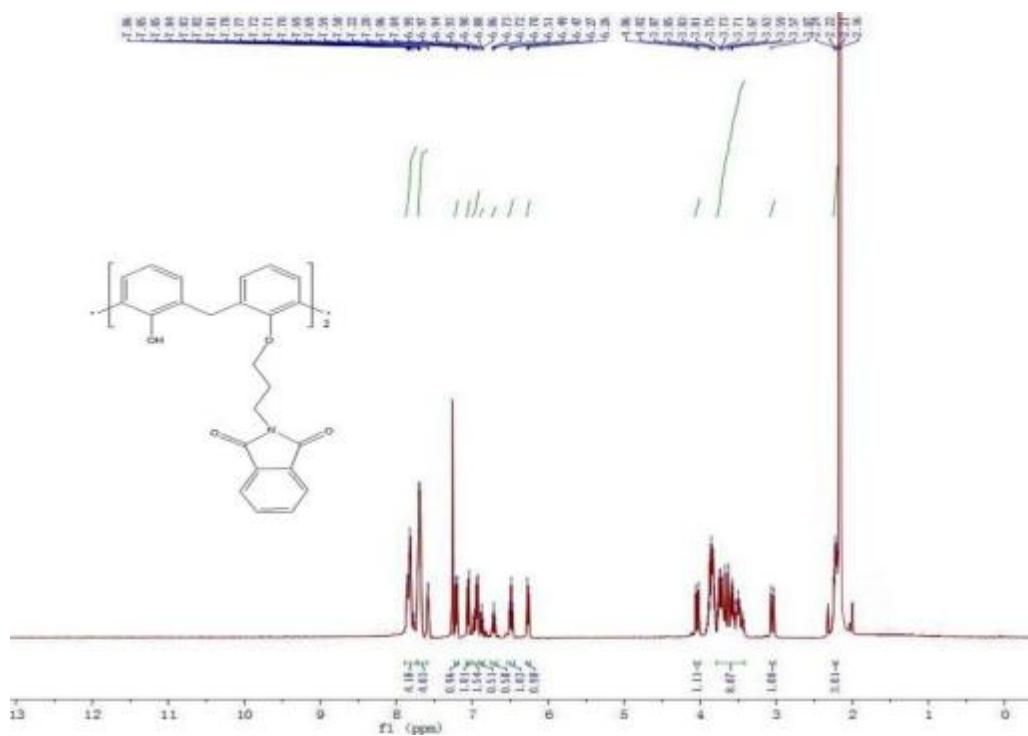

The chemical structure represents the repeating unit of a polymer:  $\text{[} \text{-C}_6\text{H}_3(\text{OH})(\text{CH}_2\text{-C}_6\text{H}_4\text{-O-CH}_2\text{-CH}_2\text{-CH}_2\text{-CH}_2\text{-N(CO)}_2\text{C}_7\text{H}_5\text{)-C}_6\text{H}_4\text{-]}_n$ . The aromatic protons are labeled 'a' through 'j'. The  $^1\text{H}$  NMR spectrum shows the following peak assignments and integrations:

- Aromatic protons (a-j):** Peaks between 6.5 and 8.0 ppm. Integration values: 1.98, 0.96, 0.15, 0.05, 0.04, 0.02, 0.02, 0.02, 0.02, 0.02.
- Methylene protons (k-l):** Peaks at approximately 3.2 and 3.4 ppm. Integration values: 0.02, 0.02, 2.25, 2.25, 0.02, 0.02.
- Benzylic proton (m):** Peak at approximately 3.8 ppm. Integration value: 1.02.
- Aliphatic protons (n-o):** Peaks at approximately 1.6 and 1.8 ppm. Integration values: 1.02, 2.06.

The inset shows the chemical structure of the polymer repeat unit:  $\left[ \text{CH}_2 - \text{CH}(\text{pyridine}) - \text{CH}_2 - \text{CH}_2 - \text{CH}(\text{OH}) - \text{CH}(\text{OH}) - \text{CH}_2 - \text{CH}_2 - \text{CH}(\text{OH}) - \text{CH}(\text{OH}) \right]_n$ . The pyridine ring is attached to the backbone at the 2-position. The dioxane ring is substituted at the 2, 3, and 6 positions with hydroxyl groups.

Figure S1.7 The  $^1\text{H}$  NMR spectrum of f2

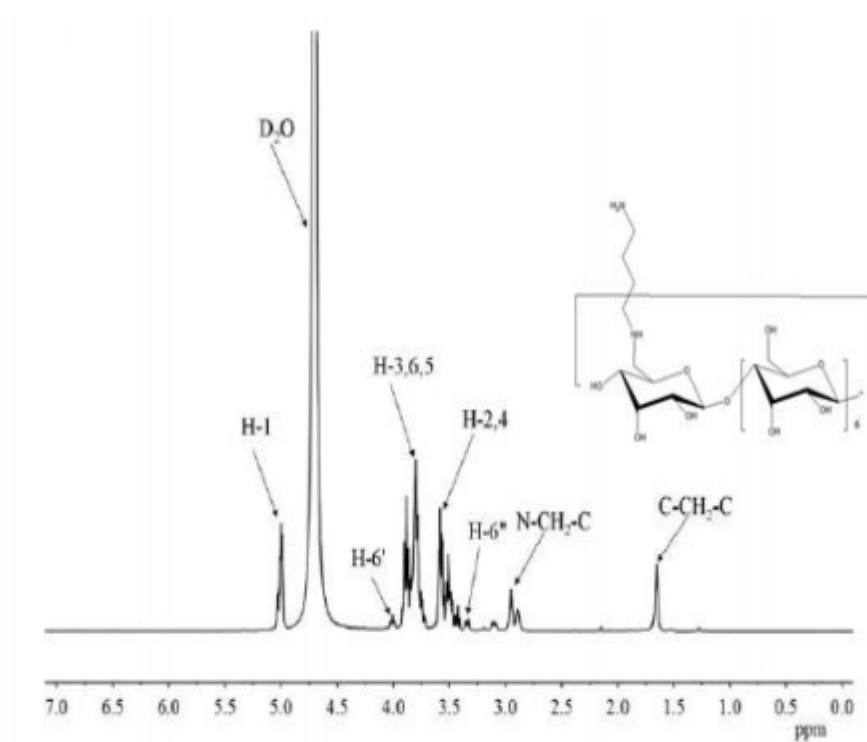

Figure S1.8 The  $^1\text{H}$  NMR spectrum of BC4PUPy

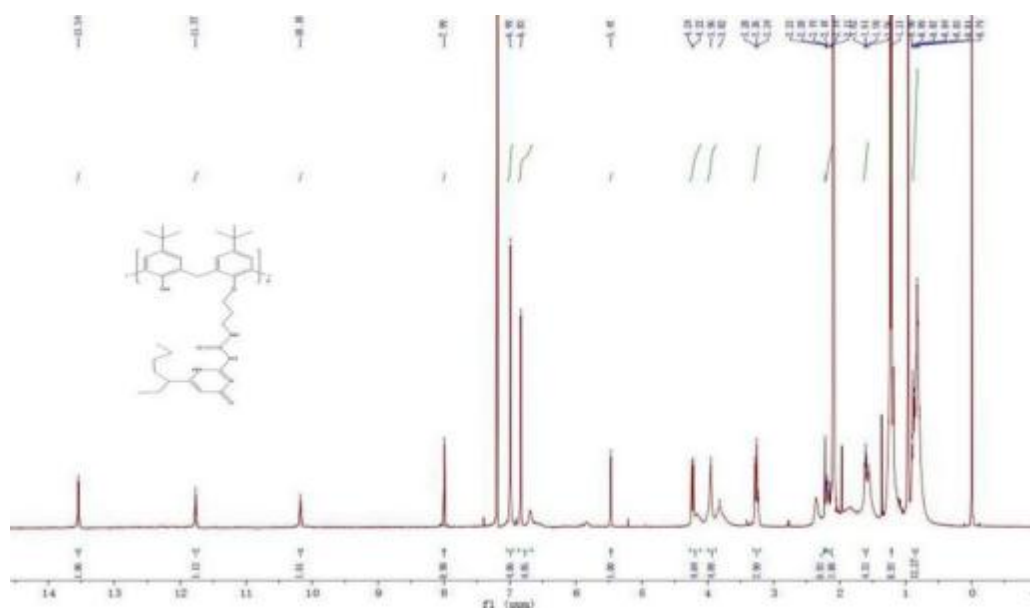

Figure S1.9 The  $^{13}\text{C}$  NMR spectrum of BC4PUPy

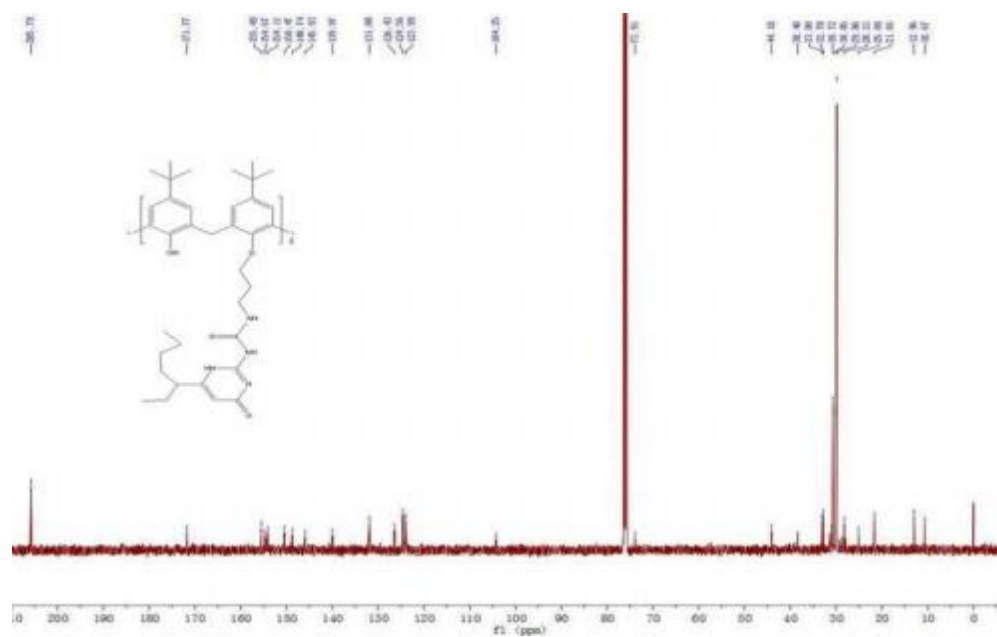

Figure S1.10 The  $^1\text{H}$  NMR spectrum of BC4HUPy

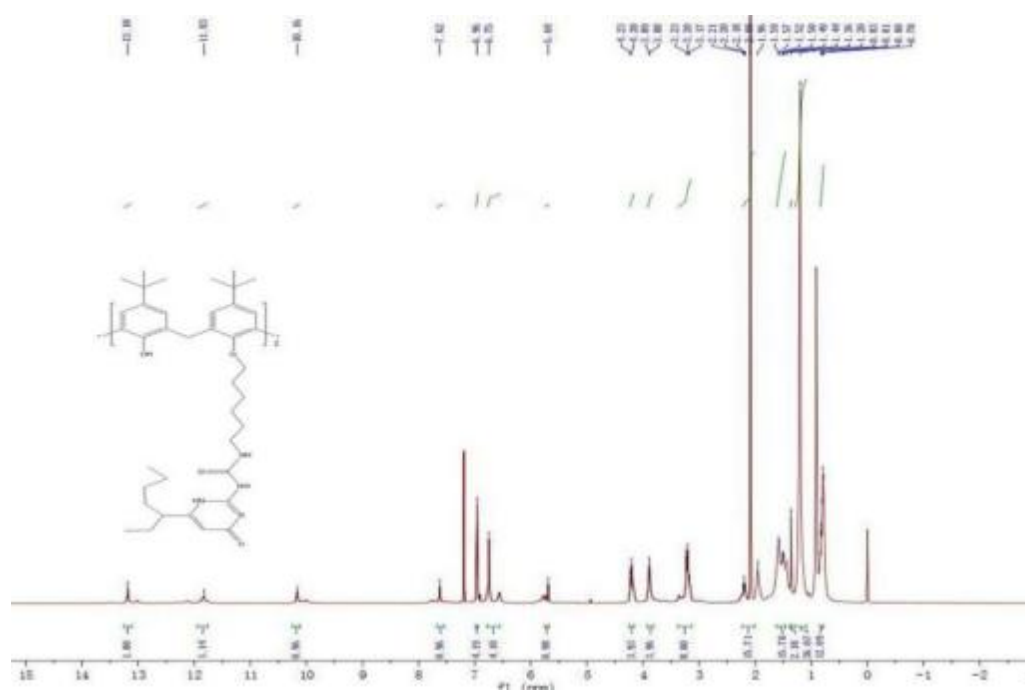

Figure S1.11 The  $^{13}\text{C}$  NMR spectrum of BC4HUPy

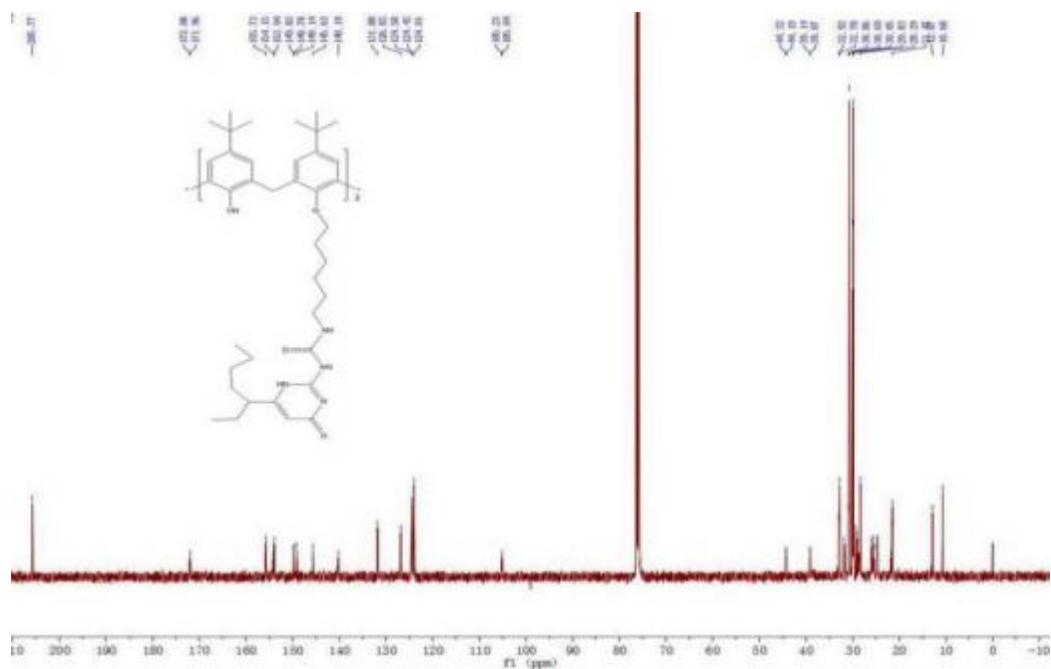

Figure S1.12 The  $^1\text{H}$  NMR spectrum of C4PUPy

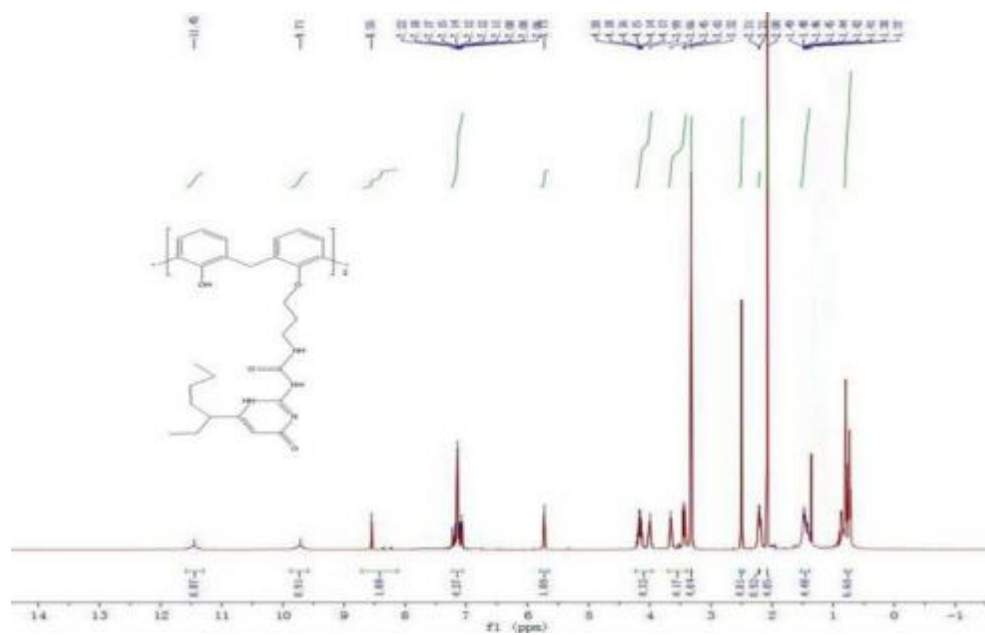

Figure S1.13 The  $^{13}\text{C}$  NMR spectrum of C4PUPy

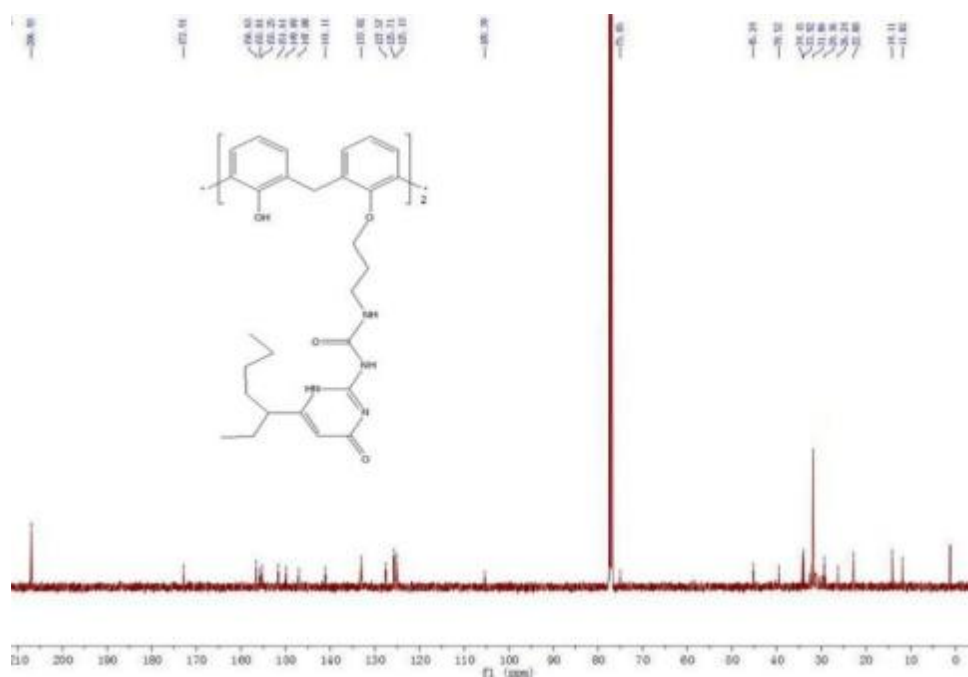

Figure S1.14 The  $^1\text{H}$  NMR spectrum of C4HUPy

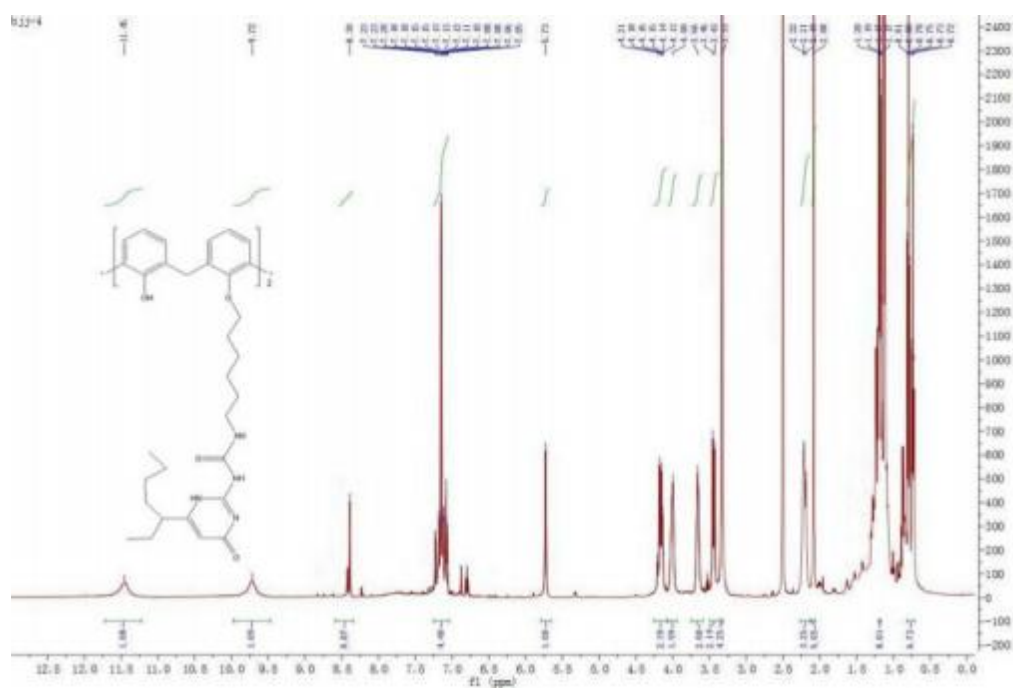

Figure S1.15 The  $^{13}\text{C}$  NMR spectrum of C4HUPy

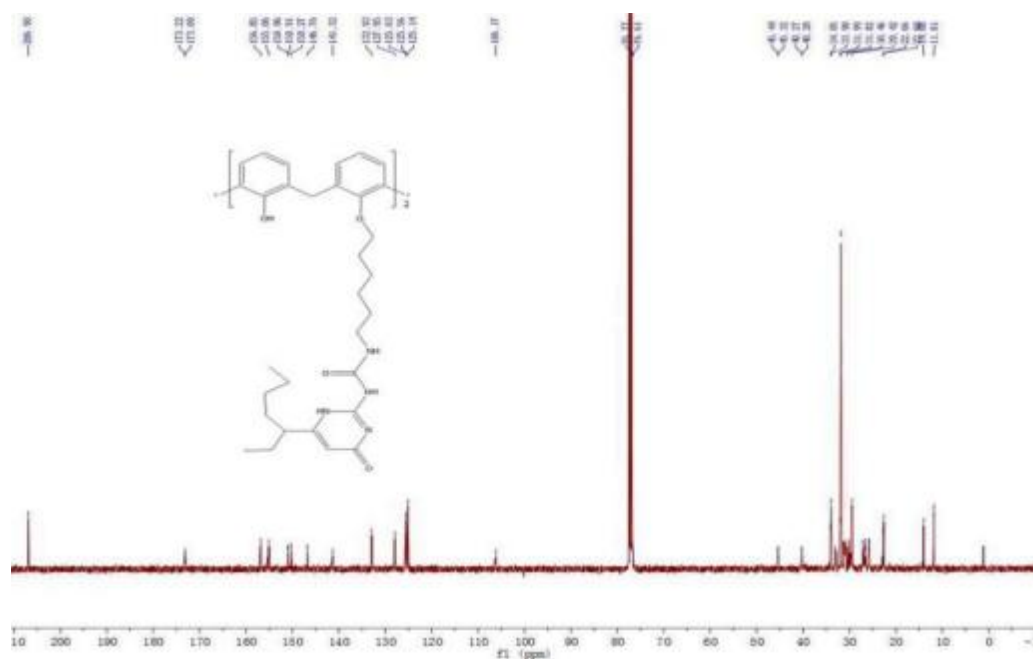

Figure S1.16 The  $^1\text{H}$  NMR spectrum of  $\beta$ -CDPUPy

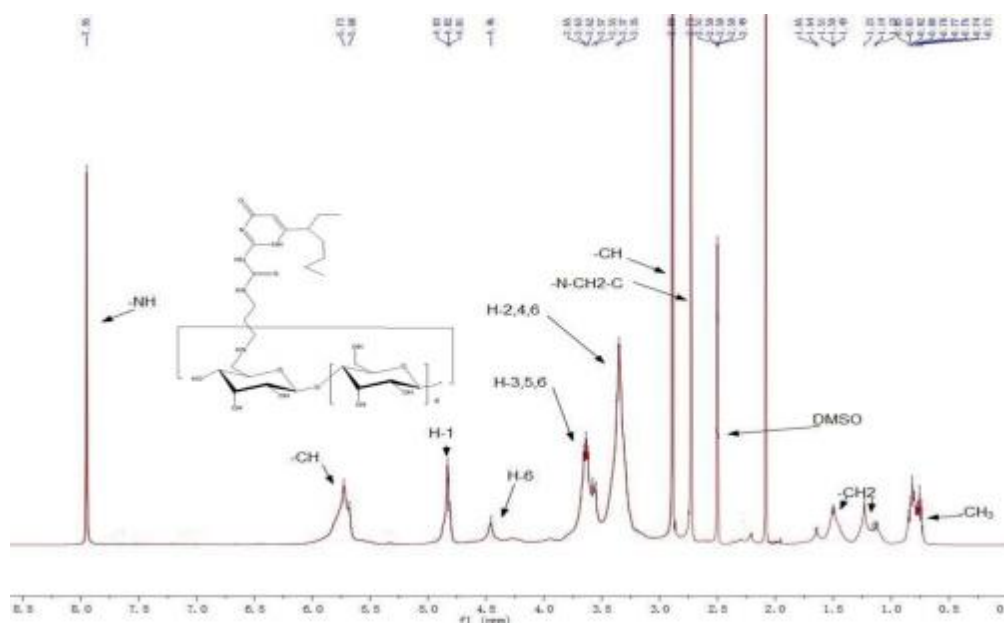

Figure S1.17 The  $^{13}\text{C}$  NMR spectrum of  $\beta$ -CDPUPy

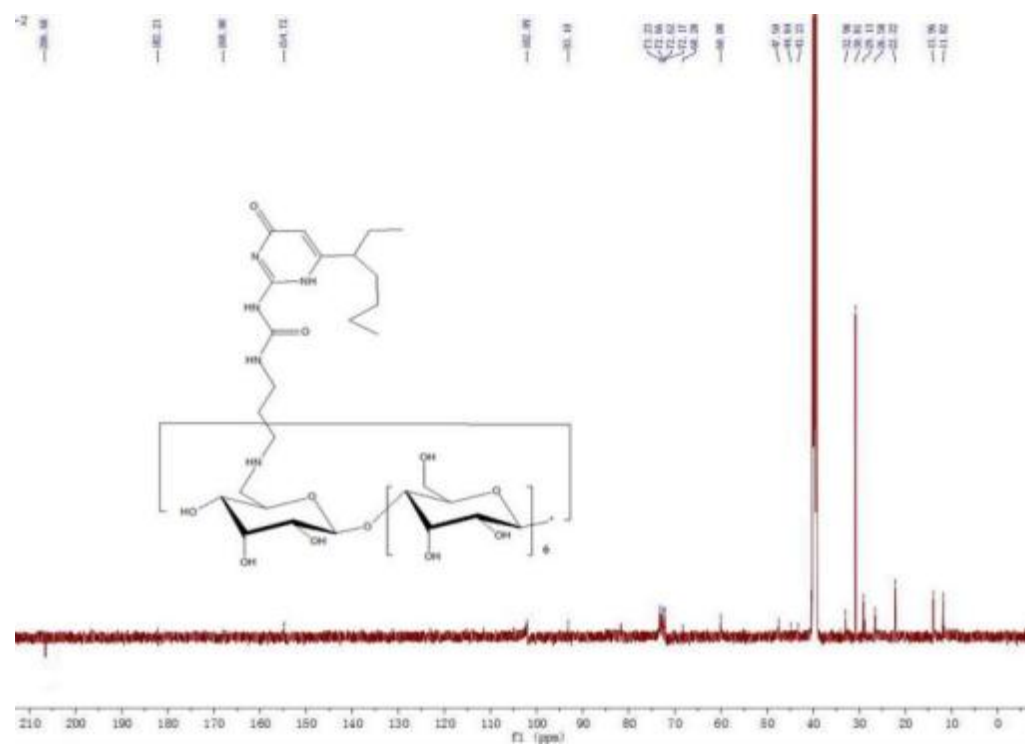

Figure S1.18 The  $^1\text{H}$  NMR spectrum of  $\beta$ -CDBUPy

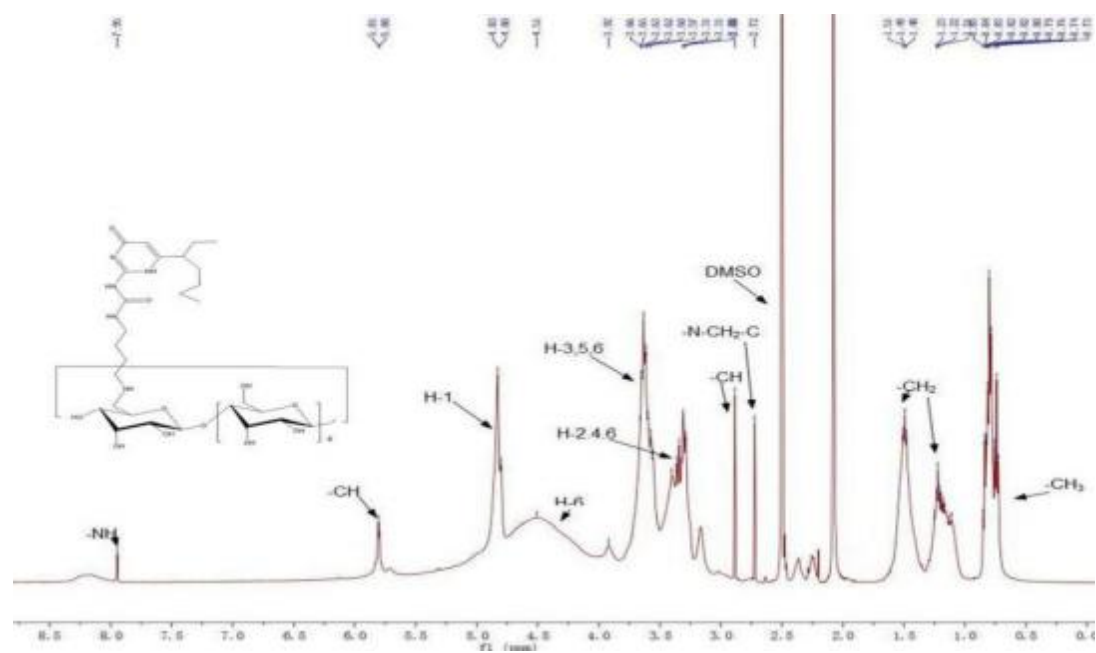



Figure S1.20 The  $^{13}\text{C}$  NMR spectrum of  $\beta$ -CDHUPy

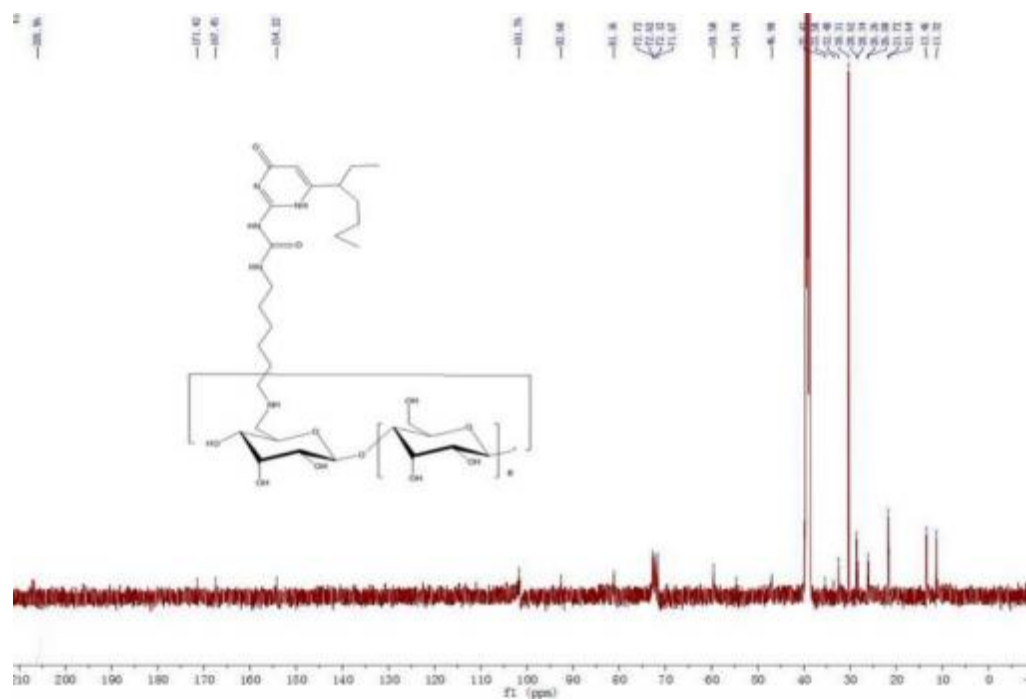

## II. Adsorption rate of 5 chosen heavy metal ions in different pH solutions by title supramolecular polymers

Figure S2.1 Adsorption rate of  $Pb^{2+}$  in different pH solutions by supramolecular polymers with calixarene as main body (6 h)

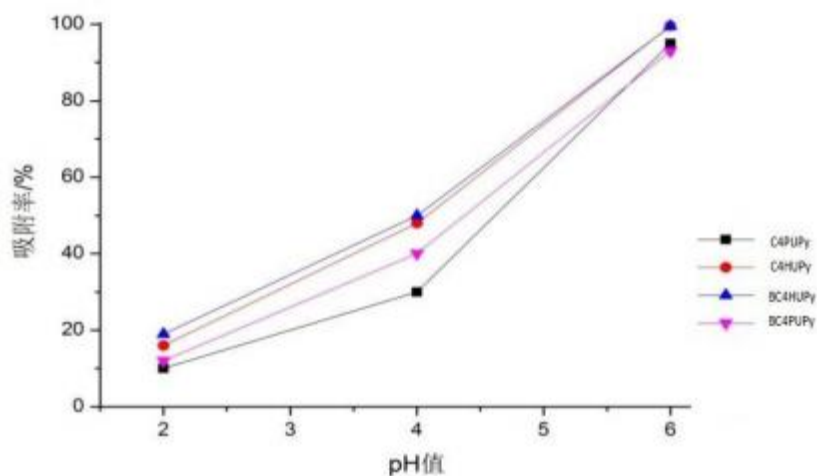

Figure S2.2 Adsorption rate of  $Pb^{2+}$  in different pH solutions by supramolecular polymers with  $\beta$ -CD as main body (6 h)

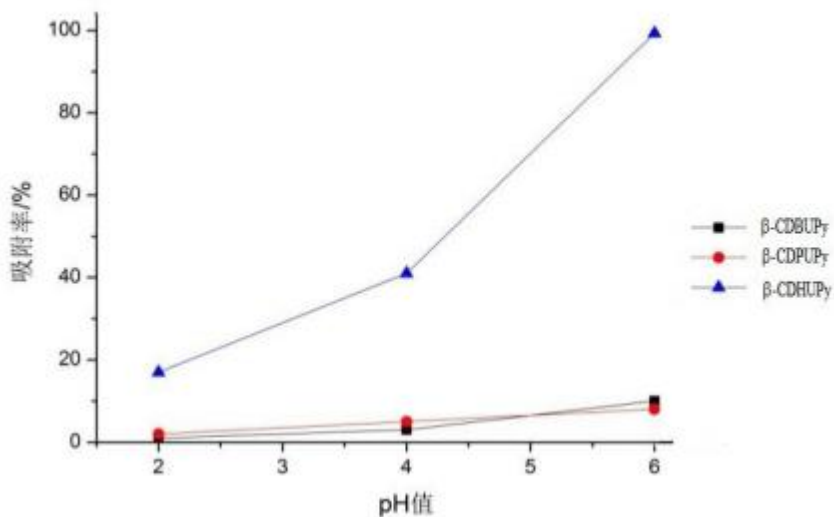

Figure S2.3 Adsorption rate of  $\text{Cd}^{2+}$  in different pH solutions by supramolecular polymers with calixarene as main body (6 h)

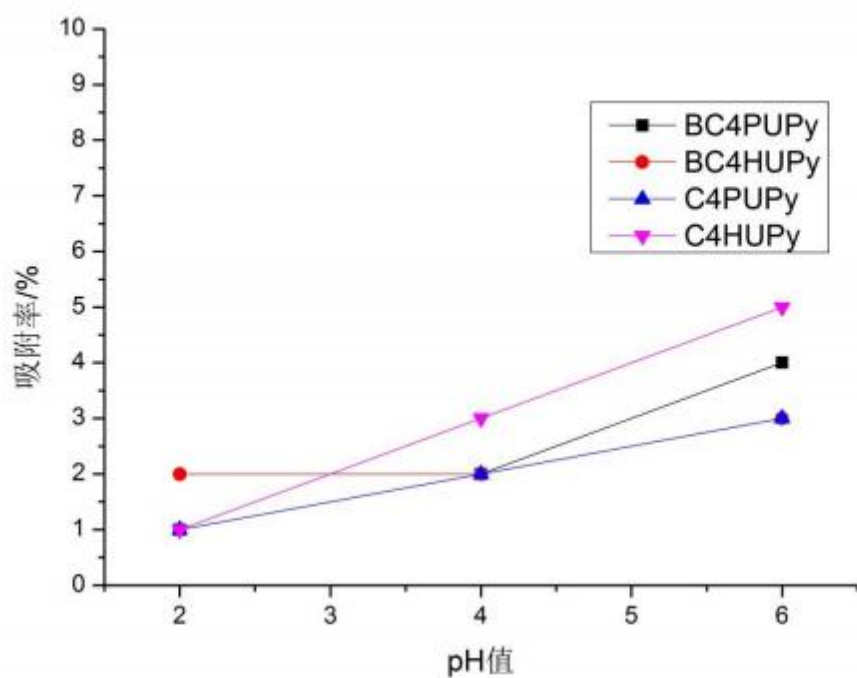

Figure S2.4 Adsorption rate of  $\text{Cd}^{2+}$  in different pH solutions by supramolecular polymers with  $\beta$ -CD as main body (6 h)

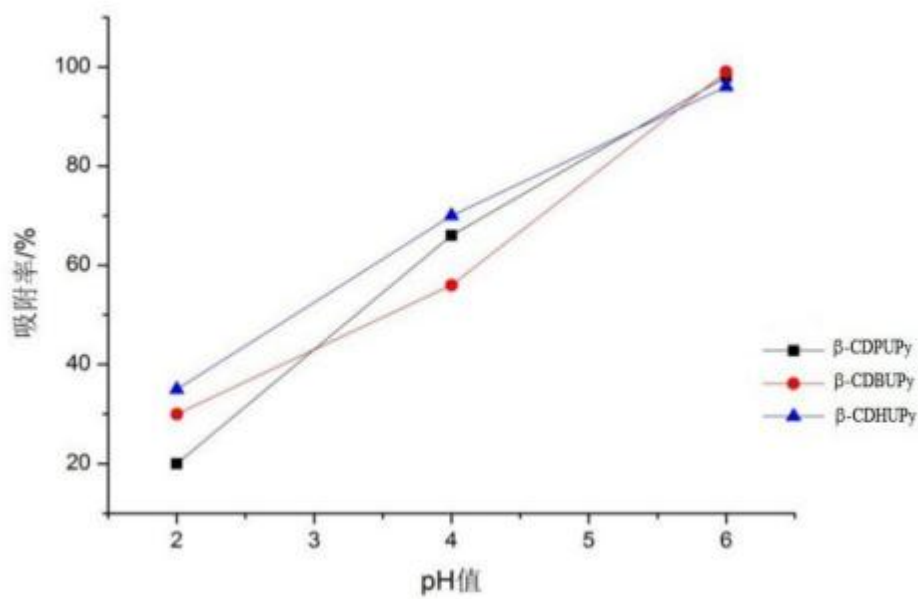

Figure S2.5 Adsorption rate of  $\text{Zn}^{2+}$  in different pH solutions by supramolecular polymers with calixarene as main body (6 h)

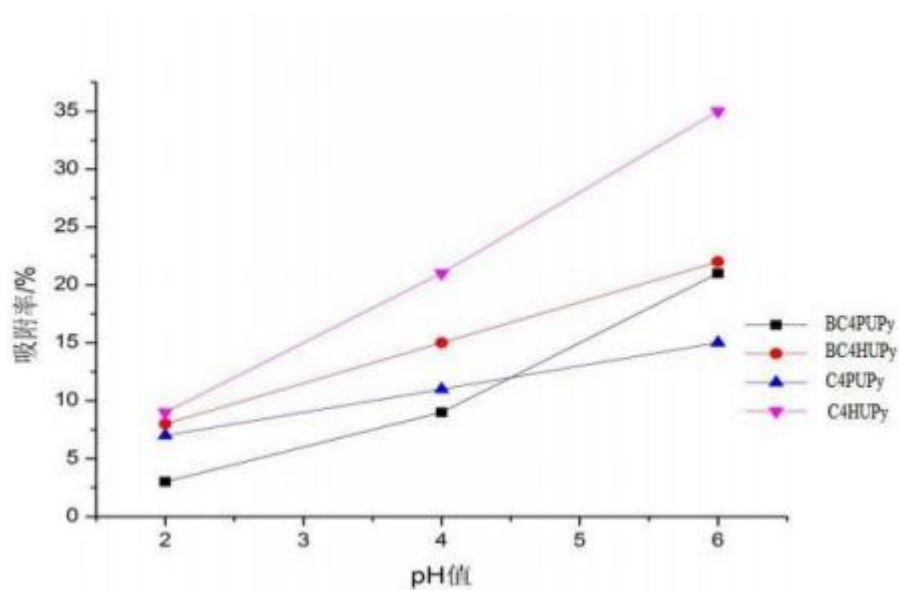

Figure S2.6 Adsorption rate of  $\text{Zn}^{2+}$  in different pH solutions by supramolecular polymers with  $\beta$ -CD as main body (6 h)

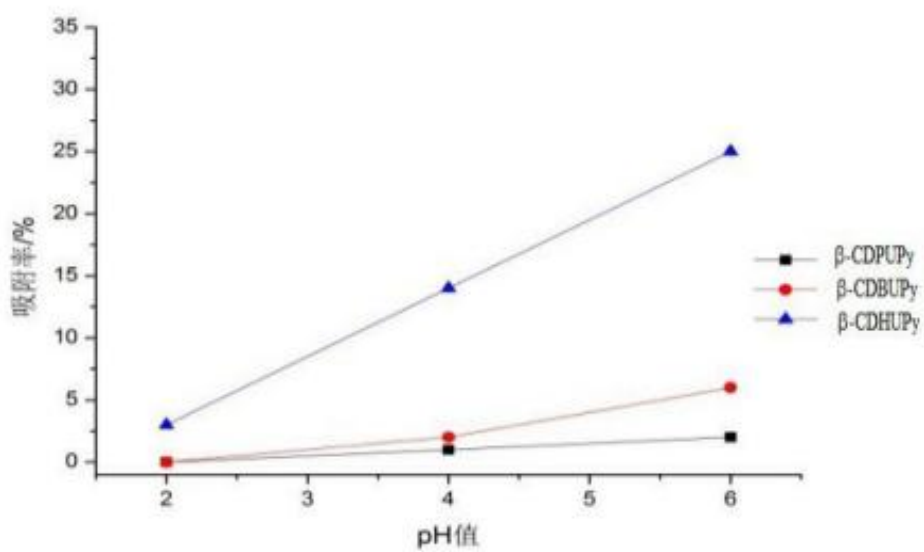

Figure S2.7 Adsorption rate of  $\text{Ni}^{2+}$  in different pH solutions by supramolecular polymers with calixarene as main body (6 h)

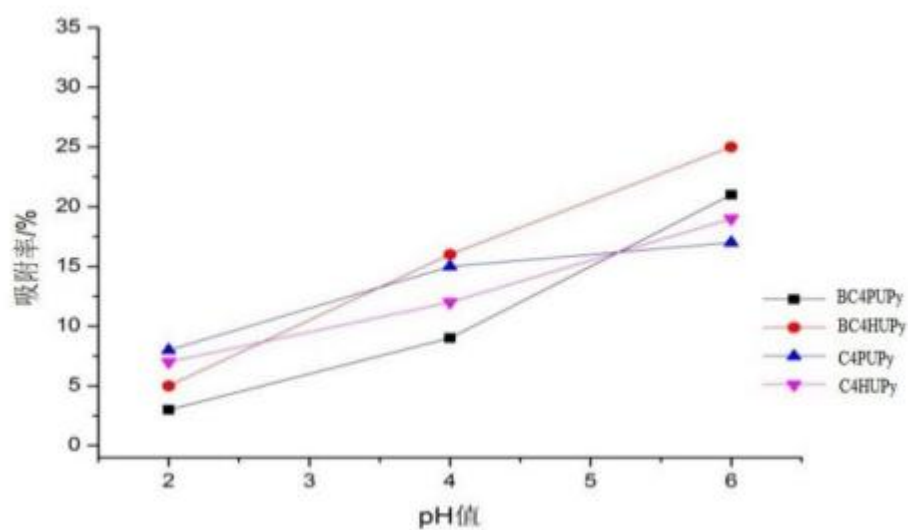

Figure S2.8 Adsorption rate of  $\text{Ni}^{2+}$  in different pH solutions by supramolecular polymers with  $\beta$ -CD as main body (6 h)

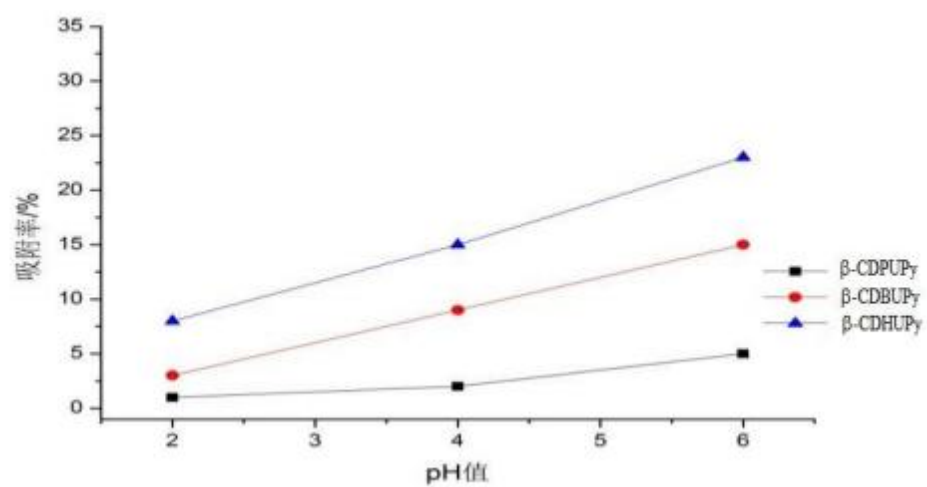

Figure S2.9 Adsorption rate of  $\text{Cu}^{2+}$  in different pH solutions by supramolecular polymers with calixarene as main body (6 h)

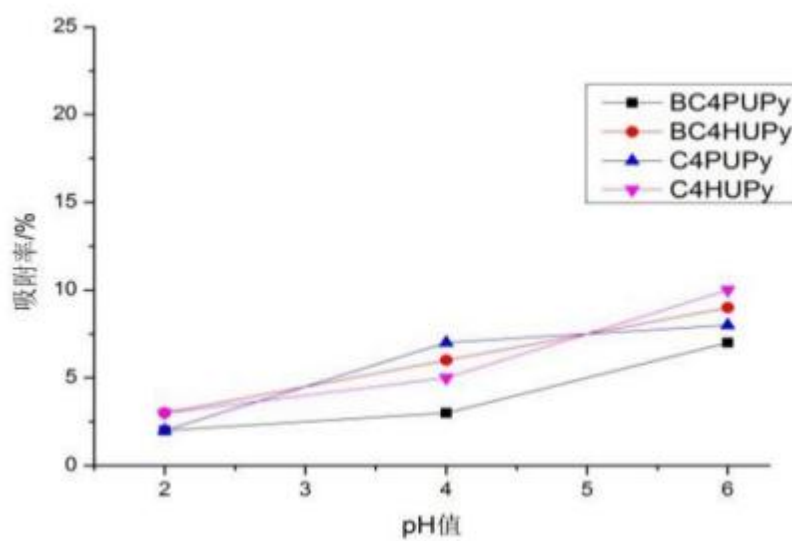

Figure S2.10 Adsorption rate of  $\text{Cu}^{2+}$  in different pH solutions by supramolecular polymers with  $\beta$ -CD as main body (6 h)

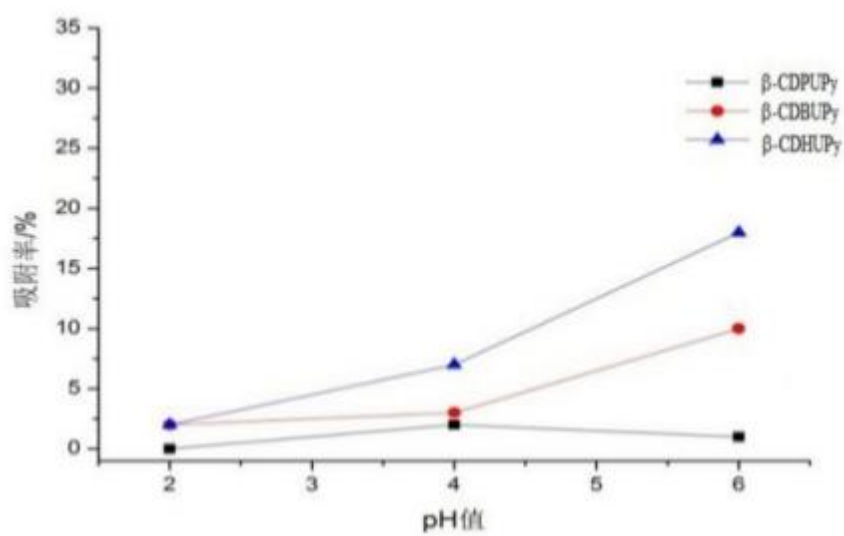

Supplement: d4ra05559d1.pdf [file d4ra05559d1.pdf]
